# Supplementary material
Source: ML conference proceedings conference paper supplement (https://openaccess.thecvf.com/content/CVPR2021/html/Tang_Layerwise_Optimization_by_CVPR_2021_paper.html)
Supplement: Supplementary file 1 [file Tang_Layerwise_Optimization_by_CVPR_2021_supplemental.pdf]

# Supplementary Material of Layerwise Optimization by Gradient Decomposition for Continual Learning

Shixiang Tang<sup>1†</sup> Dapeng Chen<sup>3</sup> Jinguo Zhu<sup>2</sup> Shijie Yu<sup>4</sup> Wanli Ouyang<sup>1</sup>

<sup>1</sup>The University of Sydney, SenseTime Computer Vision Group, Australia <sup>2</sup>Xi'an Jiaotong University

<sup>3</sup>Sensetime Group Limited, Hong Kong <sup>4</sup>Shenzhen Institutes of Advanced Technology, CAS

tangshixiang@sensetime.com dapengchenxjtu@yahoo.com wanli.ouyang@sydney.edu.au

## 1. Proof of Lemma 1

*Proof.* Following singular value decomposition (SVD) [1],  $X = U\Sigma V^\top$ , where  $U \in \mathbb{R}^{N \times N}$  and  $V \in \mathbb{R}^{n \times n}$  are unitary matrices,  $\Sigma \in \mathbb{R}^{N \times n}$  is rectangular diagonal matrix with  $r$  non-zero diagonal entries. That is,  $\Sigma$  has  $n - r$  zero column vectors. Without loss of generality, we assume that these zero column vectors are the last  $n - r$  column vectors of  $\Sigma$ . Thus,  $X = YA$ , where  $Y \in \mathbb{R}^{N \times r}$  is formed by the first  $r$  column vectors of  $U$ , and  $A \in \mathbb{R}^{r \times n}$  is formed by the first  $r$  row vectors of  $\Sigma V^\top$ . The resulting  $Y$  and  $A$  satisfy that  $Y^\top Y = \mathbf{I}$  and  $\text{rank}(A) = r$ .

As  $\text{rank}(A) = r$ ,  $AA^\top \in \mathbb{R}^{r \times r}$  is full rank. Therefore, for any  $v \in \mathbb{R}^N$ ,  $v^\top X = v^\top YA = \mathbf{0}$  implies  $v^\top Y = \mathbf{0}$ . On the other hand,  $v^\top Y = \mathbf{0}$  implies  $v^\top YA = v^\top X = \mathbf{0}$ , which completes the proof.  $\square$

## 2. Solution to Equ. (10)

Since the objective  $\|w - g\|_2^2$  is quadratic with positive definite second-order coefficient and all the constrains are affine, the optimization in Equ.(10) of the main manuscript is convex. Therefore, Karush–Kuhn–Tucker (KKT) conditions [1] applies.

The Lagrangian function of the original constraint optimization problem can be defined as follows:

$$L(w, \mu, \lambda) = \frac{1}{2} \|w - g\|_2^2 - \mu \bar{g}^\top w + \lambda^\top B^\top w, \quad (1)$$

where  $\mu \geq 0$ . Following KKT conditions, the solution to the original optimization problem should satisfy:

$$\begin{aligned} \nabla_w L(w, \mu, \lambda) &= \mathbf{0} \\ B^\top w &= \mathbf{0} \\ -\bar{g}^\top w &\leq 0 \\ \mu &\geq 0 \\ -\mu \bar{g}^\top w &= 0 \end{aligned} \quad (2)$$

Solving these equations, we have

$$w = \begin{cases} Pg, & \bar{g}^\top Pg \geq 0 \\ Pg - \frac{\bar{g}^\top Pg}{\bar{g}^\top P \bar{g}} P \bar{g}, & \bar{g}^\top Pg < 0 \end{cases} \quad (3)$$

where  $P = \mathbf{I} - BB^\top$ .

## 3. Comparison with other Relaxation Methods

In this section, we first illustrate the effectiveness of PCA relaxation compared with other relaxation methods. We denote  $K$  as the rank of task-specific matrix after relaxation. In order to show that the PCA relaxation can preserve the

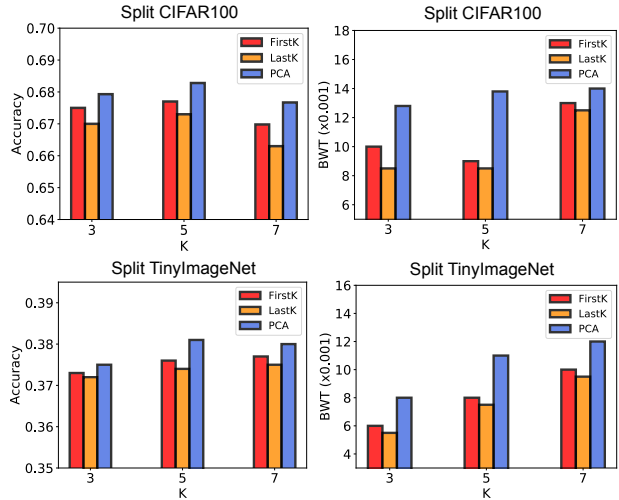

Figure 1: Average Accuracy and Backward Transfer with different relaxation methods. **FirstK**: preserving the first  $K$  elements of task-specific gradients matrix  $\hat{G}$ . **LastK**: preserving the last  $K$  elements of task-specific gradients matrix  $\hat{G}$ .

important information in the task-specific constraints, we compare PCA Relaxation with other two methods. **FirstK** is to relax the task-specific matrix by preserving its first  $K$  elements and **LastK** is to relax the task-specific matrix by

<sup>†</sup>This work was done when Shixiang Tang was an intern at SenseTime.

preserving its last  $K$  elements. Here, the first/last  $K$  elements correspond to the gradients of the first/last  $K$  episodic memory tasks.

As illustrated in Figure 1, the PCA relaxation method outperforms FirstK and LastK under different value of  $K$ . This phenomenon is partly due to that PCA relaxation preserves more knowledge than other methods. This explanation can be confirmed by larger BWT of PCA Relaxation at different  $K$ . In addition, We observe that FirstK outperforms LastK in Figure 1. This phenomenon may result from that tasks learnt earlier are easier to be forgotten than those tasks learnt later.

#### 4. Proof of $P$ is positive semidefinite

$P = I_N - BB^\top$ , where  $B \in \mathbb{R}^{N \times r}$ ,  $r < N$  and  $B^\top B = I_r$ . The following proof indicates that  $P$  is positive semidefinite.

*Proof.* Following singular value decomposition [?],  $B = U\Sigma V^\top$ , where  $U \in \mathbb{R}^{N \times N}$  and  $V \in \mathbb{R}^{r \times r}$  are unitary matrices,  $\Sigma \in \mathbb{R}^{N \times r}$  is rectangular diagonal matrix with  $r$  non-negative real numbers on the diagonal.

We first show that  $\Sigma^\top \Sigma = I_r$ . Since  $B^\top B = I_r$ ,  $V\Sigma^\top \Sigma V^\top = I_r$ . Since  $V$  is unitary,  $\Sigma^\top \Sigma = I_r$ .

We then show that  $\forall v \in \mathbb{R}^N$ ,  $v^\top BB^\top v \leq v^\top v$ . Since  $\Sigma$  is rectangular diagonal and  $\Sigma^\top \Sigma = I_r$ ,  $\Sigma \Sigma^\top = \begin{bmatrix} I_r & \mathbf{0} \\ \mathbf{0} & \mathbf{0} \end{bmatrix}$ .

Therefore,

$$\begin{aligned}
 v^\top BB^\top v &= v^\top U \Sigma \Sigma^\top U^\top v \\
 &= (v^\top U \Sigma \Sigma^\top U^\top v) \\
 &= (\Sigma \Sigma^\top U^\top v v^\top U) \\
 &\leq (U^\top v v^\top U) \\
 &= (v^\top U U^\top v) \\
 &= v^\top U U^\top v \\
 &= v^\top v.
 \end{aligned} \tag{4}$$

Thus,  $\forall v \in \mathbb{R}^N$ ,  $v^\top P v = v^\top v - v^\top BB^\top v \geq 0$ , which completes the proof.  $\square$

#### 5. Computational complexity reduction by LGU.

The main cost of our algorithm stems from Equ.(11) in the main text. We take (d) and (f) in Table 1 to analyze the time complexity of layerwise update. Denote  $T$  as the total task number and  $N$  as the number of model parameters. The total time cost of (d) is  $O((T+1)N^2 + (2T^2+1)N)$ :  $O(2T^2N)$  for calculating  $B$  by Schmidt process,  $O(TN^2)$  for calculating  $P$ , and  $O(N^2 + N)$  for getting  $w$ . Similarly, the total time cost of (f) is roughly  $O((T+1)N^2/L + (2T^2+1)N)$ , where  $L$  is the number of network layers. Since  $L > 1$ , the time cost of (f) is possibly less than that

of (d). By implementing 3-epochs setting experiments on MNIST, we found the running time of (d) and (f) for 20 tasks was 286.3s and 253.4s respectively, which empirically verified our analysis.

#### References

- [1] S. Boyd and L. Vandenberghe. *Convex optimization*. Cambridge university press, 2004. 1
